# Supplementary material for: UVB Irradiation-Induced Transcriptional Changes in Lignin- and Flavonoid Biosynthesis and Indole/Tryptophan-Auxin-Responsive Genes in Rice Seedlings
Source: MDPI journal article supplement (doi:10.3390/plants11121618), 2022-06-20
Supplement: s1 [file s1]

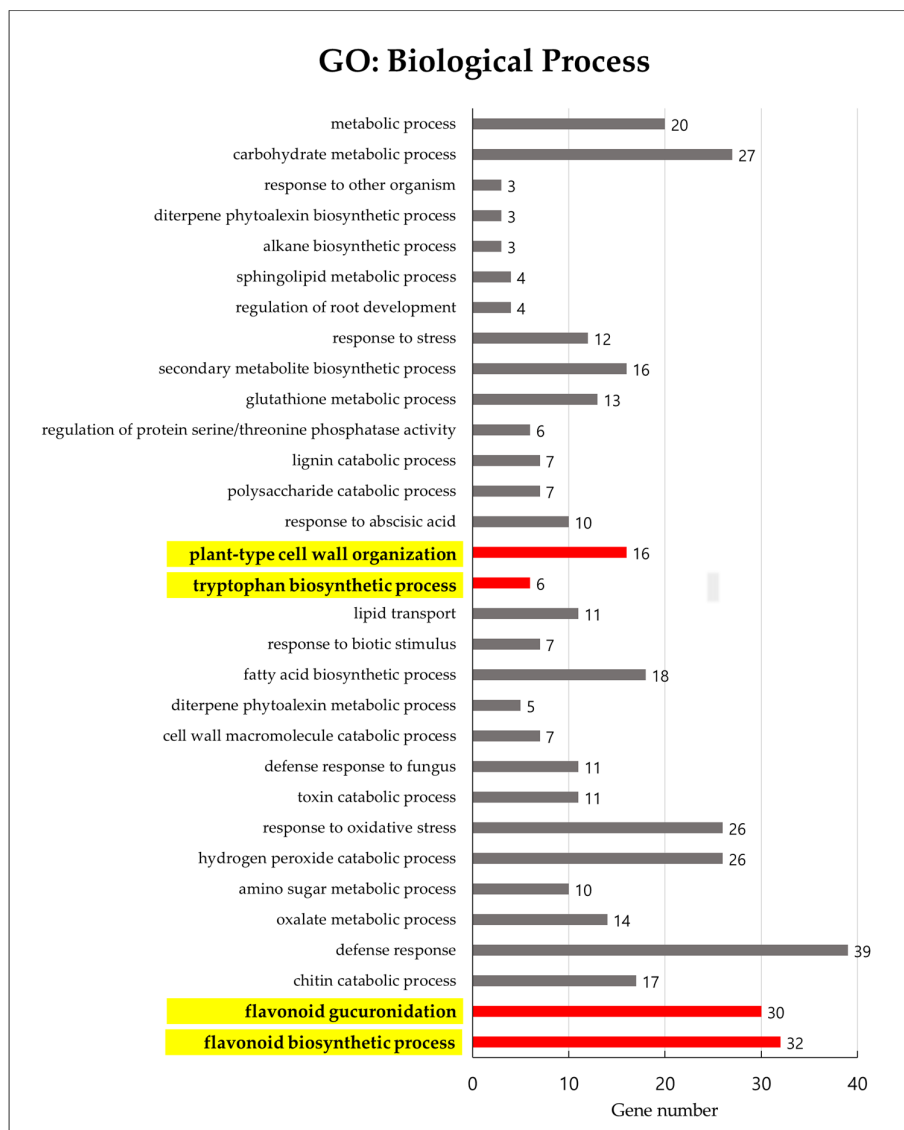

**Figure S1.** Functional category distribution of selected up-regulated genes assigned by gene ontology (GO) terms to biological processes (DAVID, v 6.8) in +UV-B compared to -UV-B during sink-to-source transition. Red bars (yellow-highlighted) represent the selected genes (84) for further analysis involved in secondary metabolism, cell wall organization (lignin), flavonoid, and indole/tryptophan biosynthesis.

| Compound            | RT <sup>a</sup> | RRT <sup>b</sup> | Quantification ion <sup>c</sup> |
|---------------------|-----------------|------------------|---------------------------------|
| Pyruvic acid        | 4:45            | 0.435            | 174                             |
| Lactic acid         | 4:51            | 0.444            | 147                             |
| Alanine (Ala)       | 5:21            | 0.49             | 116                             |
| Glycolic acid       | 6:28            | 0.592            | 147                             |
| Valine (Val)        | 6:35            | 0.603            | 144                             |
| Urea                | 6:50            | 0.626            | 189                             |
| Ethanolamine        | 7:06            | 0.651            | 174                             |
| Phosphoric acid     | 7:07            | 0.652            | 299                             |
| Leucine (Leu)       | 7:08            | 0.654            | 158                             |
| Isoleucine (Ile)    | 7:21            | 0.674            | 158                             |
| Proline (Pro)       | 7:26            | 0.681            | 142                             |
| Glycine (Gly)       | 7:30            | 0.687            | 174                             |
| Succinic acid       | 7:34            | 0.693            | 147                             |
| Glyceric acid       | 7:40            | 0.703            | 147                             |
| Fumaric acid        | 7:55            | 0.724            | 245                             |
| Serine (Ser)        | 7:58            | 0.729            | 204                             |
| Threonine (Thr)     | 8:12            | 0.75             | 219                             |
| β-Alanine           | 8:37            | 0.789            | 174                             |
| Malic acid          | 9:06            | 0.833            | 147                             |
| Aspartic acid       | 9:22            | 0.858            | 100                             |
| Methionine (Met)    | 9:25            | 0.863            | 176                             |
| Pyroglutamic acid   | 9:28            | 0.867            | 156                             |
| 4-Aminobutyric acid | 9:30            | 0.87             | 174                             |
| Threonic acid       | 9:39            | 0.884            | 147                             |
| Glutamic acid       | 10:11           | 0.932            | 246                             |
| Phenylalanine (Phe) | 10:19           | 0.944            | 218                             |
| Xylose              | 10:24           | 0.951            | 103                             |
| Asparagine (Asn)    | 10:35           | 0.969            | 116                             |
| Glutamine (Gln)     | 11:22           | 1.04             | 156                             |
| Shikimic acid       | 11:33           | 1.057            | 204                             |
| Citric acid         | 11:38           | 1.065            | 273                             |
| Quinic acid         | 11:54           | 1.089            | 345                             |
| Fructose            | 11:58           | 1.096            | 103                             |
| Mannose             | 12:04           | 1.104            | 147                             |
| Galactose           | 12:07           | 1.109            | 147                             |
| Glucose             | 12:09           | 1.113            | 160, 319                        |
| Inositol            | 13:27           | 1.231            | 305                             |
| Ferulic acid        | 13:33           | 1.24             | 338                             |
| Tryptophane (Trp)   | 14:17           | 1.307            | 202                             |
| Sucrose             | 16:25           | 1.502            | 217                             |

<sup>a</sup>Retention time (min)

<sup>b</sup>Relative retention time (retention time of analyte/retention time of internal standard)

<sup>c</sup>Specific mass ion used for quantification

**Figure S2.** Extraction and analysis of polar metabolites. Polar metabolites were extracted as described previously (Kim et al., 2016). The metabolites were extracted from powdered tissue (100 mg) by adding 1 mL of 2.5:1:1 (v/v/v) methanol: water: chloroform. Ribitol (60  $\mu$ L, 0.2 mg/mL) was used as an internal standard (IS). Extraction was performed at 37 °C at a mixing frequency of 1200 rpm for 30 min using a Thermomixer Compact (Eppendorf AG, Germany). The extracts were centrifuged at 16,000  $\times$  g for 3 min. The polar phase (0.8 mL) mixed with 0.4 mL water was centrifuged at 16,000  $\times$  g for 3 min. The methanol/water phase was dried in a centrifugal concentrator (CC-105, TOMY, Tokyo, Japan) for 2 h, followed by a freeze dryer for 16 h. MO-derivatization was performed by adding 80  $\mu$ L of methoxyamine hydrochloride (20 mg/mL) in pyridine and shaking at 30 °C for 90 min. TMS-esterification was performed by adding 80  $\mu$ L of MSTFA, followed by incubation at 37 °C for 30 min. GC-TOFMS was performed using an Agilent 7890A gas chromatograph (Agilent, Atlanta, GA, USA) coupled to a Pegasus HT-TOF mass spectrometer (LECO, St. Joseph, MI). Each derivatized sample (1  $\mu$ L) was separated on a 30-cm  $\times$  0.25-mm I.D. fused-silica capillary column coated with 0.25- $\mu$ m CP-SIL 8 CB low bleed (Varian Inc., Palo Alto, CA, USA). The split ratio was set to 1:25. The injector temperature was 230 °C, and a flow rate of helium gas through the column was fixed with 1.0 mL/min. The temperature was set up as follows: initial of 80 °C for 2 min, followed by an increase to 320 °C at 15 °C/min and a 10 min hold at 320 °C. The transfer line temperature and ion-source temperature were 250 and 200 °C, respectively. The scanned mass range was 85–600  $m/z$ , and the detector voltage was set to 1700 V. ChromaTOF software was used to support peak findings prior to quantitative analysis and for automated deconvolution of the reference mass spectra. NIST and in-house libraries for standard chemicals were utilized for compound identification. The calculations used to quantify the concentrations of all analytes were based on the peak area ratios for each compound relative to the peak area of the IS.

**Table S1.** Short description of selected up-regulated DEGs (KEGG-identified) under +UVB.

| Pathway                                                      | Gene ID      | Enzyme | Short Description                                                            |
|--------------------------------------------------------------|--------------|--------|------------------------------------------------------------------------------|
| Lignin<br>(phenylpropanoid)<br>biosynthesis                  | Os06g0681600 | POD    | Heme peroxidase family protein; Similar to peroxidase 39                     |
|                                                              | Os02g0697400 | 4CL    | 4-coumarate:coenzyme A ligase                                                |
|                                                              | Os02g0187800 | CAD    | Cinnamyl-alcohol dehydrogenase                                               |
| Flavonoid<br>biosynthesis                                    | Os11g0530600 | CHS    | Chalcone synthase                                                            |
|                                                              | Os03g0819600 | CHI    | Chalcone isomerase                                                           |
|                                                              | Os02g067300  | FLS    | Flavonol synthase                                                            |
| Phenylalanine,<br>tyrosine and<br>tryptophan<br>Biosynthesis | Os03g0264400 | AS     | Anthranilate synthase alpha 2 subunit                                        |
|                                                              | Os03g0126000 | APRT   | Similar to Phosphorybosyl anthranilate transferase 1                         |
|                                                              | Os02g0266000 | PRAI   | Similar to N-(5'-phosphoribosyl)anthranilate isomerase                       |
|                                                              | Os09g0255400 | IGPS   | Similar to Indole-3-glycerol phosphate synthase,<br>chloroplast precursor    |
|                                                              | Os07g0182100 | TS     | Similar to Tryptophan synthase alpha chain                                   |
| Auxin-responsive<br>SAUR gene family                         | Os06g0701900 | SAUR27 | Auxin-responsive SAUR gene family member, SMALL<br>AUXIN-UP RNA 27           |
|                                                              | Os09g0547100 | SAUR55 | Similar to Auxin induced protein, SMALL AUXIN-UP<br>RNA 55                   |
| B-box-containing<br>protein                                  | Os02g0606200 | BBX4   | Zinc finger, B-box domain containing protein, B-box-<br>containing protein 4 |
|                                                              | Os04g0493000 | BBX11  | B-box-containing protein 11                                                  |

**Table S2.** Primer sequences used for qRT-PCR.

| Gene ID             | Gene   | Forward (5'-3')      | Reverse (5'-3')      | Tm (°C) | Product size (bp) |
|---------------------|--------|----------------------|----------------------|---------|-------------------|
| <i>Os02g0697400</i> | 4CL    | CATGGTGCTGCTCCAGAA   | TAGACGGACTGGGTGAGGAT | 57      | 162               |
| <i>Os02g0187800</i> | CAD    | AAGGTGGCCAAGTCGATG   | GCACGGTGTGCGATGATGTA | 57      | 166               |
| <i>Os06g0681600</i> | POD    | GGTGTGCGATCAAGCAGGAG | CCTTTCCCGGTGAAGTTGTA | 55      | 189               |
| <i>Os11g0530600</i> | CHS    | GGGCTCATCTCGAAGAACAT | CTCGACATGTTGCCGTACTC | 55      | 200               |
| <i>Os03g0819600</i> | CHI    | AAGTTCACGAGGGTGACGAT | AGTGGGTGAAGAGGATGGAC | 57      | 193               |
| <i>Os02g0767300</i> | FLS    | GCTCTTCCAGGTGGTGAAC  | GAGGTCCTTCTGCAGCTTG  | 57      | 166               |
| <i>Os03g0264400</i> | AS     | AGAGGTTTGAGAGGCGAACA | CCAGCAAGTGACGGTTAAT  | 55      | 178               |
| <i>Os03g0126000</i> | APRT   | TGCACGCTGGAAGATCTAAA | GCGTTGTGTTTCCTGTGCTA | 55      | 186               |
| <i>Os02g0266000</i> | PRAI   | CGCCATCAATCTCGTCAGTA | AGCAGCTCCATCATTTGGTT | 55      | 161               |
| <i>Os09g025540</i>  | IGPS   | CGGCATCAATAACCGAAGTT | TTGCAGAAACACCAGCATTC | 55      | 173               |
| <i>Os07g0182100</i> | TS     | AGACCGCATTCATTCCATTC | CCTCAAATGTGGTGCCTTTT | 55      | 192               |
| <i>Os06g0701900</i> | SAUR27 | GGCGAGCAACAAGATCAG   | ATCTCCTCGCCGACGTA    | 58      | 135               |
| <i>Os09g0547100</i> | SAUR55 | CGAAGGATGGCAGCA      | ACGCCAATGGCACCT      | 60      | 154               |
| <i>Os02g0606200</i> | BBX4   | CAGTTCTCCGACTACGAGAC | GTAGTACGCCACGTCGTT   | 55      | 198               |
| <i>Os04g0493000</i> | BBX11  | GGTTCAGCTCCGTCTGTAG  | ACTCGTAGTCGGAGAGCTG  | 58      | 207               |
| <i>Actin</i>        |        | TGTATGCCAGTGGTCGTACC | CCAGCAAGGTCGAGACGAA  | 57      | 186               |

**Table S3.** Gene expression of -/+UVB treatment by date by RNA-seq.

| Gene                | Gene ID | FPKM          |               |               |               |               |               | Log2 FC |         |       |         |       |         |
|---------------------|---------|---------------|---------------|---------------|---------------|---------------|---------------|---------|---------|-------|---------|-------|---------|
|                     |         | Day 1<br>-UVB | Day 1<br>+UVB | Day 3<br>-UVB | Day 3<br>+UVB | Day 5<br>-UVB | Day 5<br>+UVB | Day 1   | p-value | Day 3 | p-value | Day 5 | p-value |
| <i>Os02g0697400</i> | 4CL     | 1.96          | 31.67         | 31.07         | 21            | 25.48         | 22.63         | 3.88    | 0.0063  | -0.68 | 0.4773  | -0.32 | 0.5924  |
| <i>Os02g0187800</i> | CAD     | 15.45         | 113.24        | 130.6         | 108.04        | 134.47        | 179.85        | 2.74    | 0.0124  | -0.39 | 0.6093  | 0.27  | 0.5671  |
| <i>Os06g0681600</i> | POD     | 38.62         | 337.51        | 214.84        | 197.21        | 266.99        | 360.46        | 3.00    | 0.0042  | -0.24 | 0.749   | 0.29  | 0.5557  |
| <i>Os11g0530600</i> | CHS     | 30.74         | 196.12        | 243.26        | 136.85        | 225.66        | 244.52        | 2.54    | 0.0262  | -0.94 | 0.3774  | 0.12  | 0.9593  |
| <i>Os03g0819600</i> | CHI     | 7.64          | 823.47        | 936.42        | 367.4         | 900.78        | 1002.83       | 6.62    | 0.001   | -1.46 | 0.094   | 0.15  | 0.9869  |
| <i>Os02g0767300</i> | FLS     | 0             | 4.53          | 6.68          | 2.02          | 8.02          | 8.13          | 2.18    | 0.0002  | -1.84 | 0.1154  | 0.02  | 0.8685  |
| <i>Os03g0264400</i> | AS      | 74.26         | 40.74         | 26.67         | 256.23        | 38.49         | 76.78         | -1.00   | 0.3268  | 3.15  | 0.0006  | 0.85  | 0.0998  |
| <i>Os03g0126000</i> | APRT    | 30.72         | 38.47         | 20.73         | 217.45        | 36.47         | 75.5          | 0.19    | 0.8504  | 3.28  | 0.001   | 0.91  | 0.0781  |
| <i>Os02g0266000</i> | PRAI    | 6.01          | 11.33         | 4.04          | 65.1          | 6.68          | 21.97         | 0.79    | 0.3855  | 3.9   | 0.0003  | 1.57  | 0.0051  |
| <i>Os09g025540</i>  | IGPS    | 13.36         | 25.07         | 1.76          | 306.51        | 3.01          | 71.54         | 0.78    | 0.4003  | 7.33  | 0.0006  | 4.43  | 0.0001  |
| <i>Os07g0182100</i> | TS      | 29.59         | 57.8          | 19.09         | 490.96        | 23.22         | 123.51        | 0.84    | 0.3392  | 4.57  | 0.0001  | 2.27  | 0.0001  |
| <i>Os06g0701900</i> | SAUR27  | 0.2           | 0.9           | 0.88          | 0             | 1.39          | 3.17          | 2.02    | 0.4407  | -3.14 | 0.028   | 1.04  | 0.3784  |
| <i>Os09g0547100</i> | SAUR55  | 0             | 2.65          | 1.08          | 0             | 3.64          | 2.07          | 1.41    | 0.0226  | -3.43 | 0.0155  | -0.96 | 0.4222  |
| <i>Os02g0606200</i> | BBX4    | 38.75         | 226.77        | 337.27        | 156.8         | 220.9         | 92.22         | 2.42    | 0.033   | -1.22 | 0.1229  | -1.41 | 0.0064  |
| <i>Os04g0493000</i> | BBX11   | 1008.35       | 814.76        | 1102.5        | 472.34        | 793.9         | 294.49        | -0.44   | 0.6411  | -1.34 | 0.1137  | -1.58 | 0.0034  |
